# Supplementary material for: Black Soldier Fly (Hermetia illucens) Larvae and Prepupae Defatted Meals in Diets for Zebrafish (Danio rerio)
Source: PubMed Central journal article supplement (PMC7999764; doi:10.3390/ani11030720), 2021-03-06
Supplement: animals-11-00720-s001.pdf [file animals-11-00720-s001.pdf]

Article

## Black Soldier Fly (*Hermetia illucens*) Larvae and Prepupae Defatted Meals in Diets for Zebrafish (*Danio rerio*)

Carlos F. C. Lanes, Fabio A. Pedron, Giovanni T. Bergamin, Andressa L. Bitencourt, Brenda E. R. Dorneles, Jessica C. V. Villanova, Kimberly C. Dias, Kristian Riolo, Sabrina Oliva, Domenico Savastano and Alessia Giannetto

### Supplementary Materials

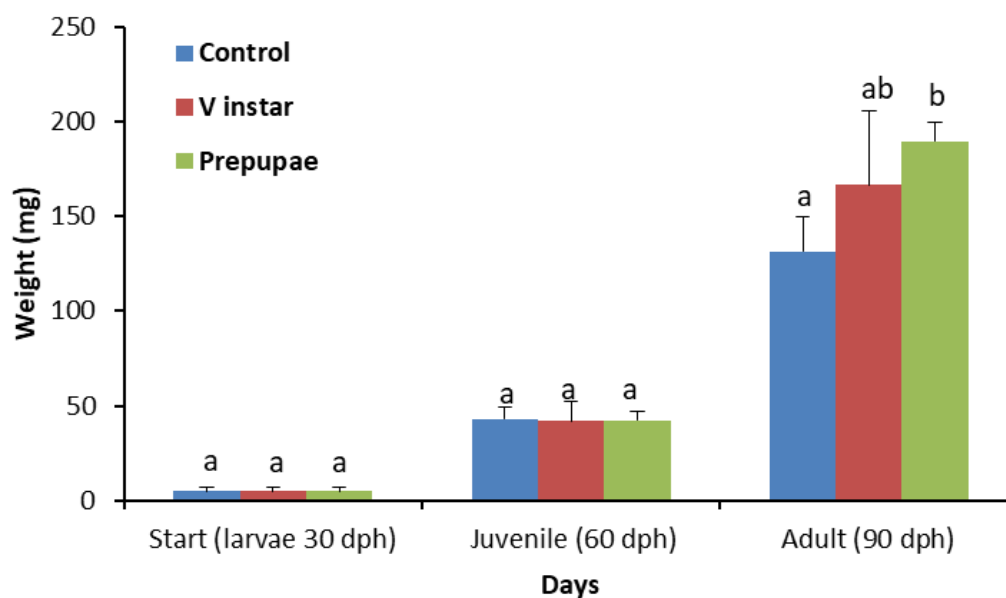

**Figure S1.** Weight of zebrafish (*Danio rerio*) fed with experimental diets (control, V-instar, and prepupae) throughout of experiment.
